# Supplementary material for: Retention in Care, Mortality, Loss-to-Follow-Up, and Viral Suppression among Antiretroviral Treatment-Naïve and Experienced Persons Participating in a Nationally Representative HIV Pre-Treatment Drug Resistance Survey in Mexico
Source: MDPI journal article supplement (doi:10.3390/pathogens10121569), 2021-12-01
Supplement: s1 [file s1]

## Supplementary Material

**Table S1.** Clinical outcomes according to availability of viral load information in Mexican persons living with HIV, 2017-2019.

| Outcome                              |              | experienced<br>+resistant<br>n=20 |                       | experienced<br>+non-resistant<br>n=211 |           | naïve<br>+resistant<br>n=165 |          | naïve<br>+non-resistant<br>n=1427 |           | Total<br>N=1823 |            |
|--------------------------------------|--------------|-----------------------------------|-----------------------|----------------------------------------|-----------|------------------------------|----------|-----------------------------------|-----------|-----------------|------------|
|                                      |              | N                                 | VS, n(%) <sup>1</sup> | N                                      | VS, n (%) | N                            | VS, n(%) | N                                 | VS, n(%)  | N               | VS, n (%)  |
| With viral<br>load<br>Information    | In Care      | 10                                | 5 (50%)               | 128                                    | 82 (64%)  | 118                          | 91 (77%) | 1003                              | 843 (84%) | 1259            | 1021 (81%) |
|                                      | LTFU         | 3                                 | 0 (0%)                | 44                                     | 8 (18%)   | 27                           | 9 (33%)  | 256                               | 77 (30%)  | 330             | 94 (28%)   |
|                                      | Death        | 1                                 | 0 (0%)                | 7                                      | 2 (28%)   | 5                            | 0 (0%)   | 35                                | 9 (26%)   | 48              | 11 (23%)   |
|                                      | <i>Total</i> | 14 (70%)                          |                       | 179 (85%)                              |           | 150 (91%)                    |          | 1294 (91%)                        |           | 1637 (89%)      |            |
| Without<br>viral load<br>information | In Care      | 1                                 |                       | 4                                      |           | 0                            |          | 12                                |           | 17              |            |
|                                      | LTFU         | 3                                 |                       | 18                                     |           | 13                           |          | 81                                |           | 115             |            |
|                                      | Death        | 2                                 |                       | 10                                     |           | 2                            |          | 40                                |           | 54              |            |
|                                      | <i>Total</i> | 6 (30%)                           |                       | 32 (15%)                               |           | 15 (9%)                      |          | 133 (9%)                          |           | 186 (10%)       |            |

VS, viral suppression: last viral load <200 copies/ml at the end of follow-up among persons with viral load information available within 6 months prior to the last database entry. <sup>1</sup>n(%): number and percentage of persons with viral suppression in each outcome and availability of viral load information status. LTFU, lost to follow-up: defined as persons with a non-active status due to ART abandonment, migration to other healthcare systems, unknown status, as well as lack of viral load follow-up for more than 6 months at the dataset closure date.

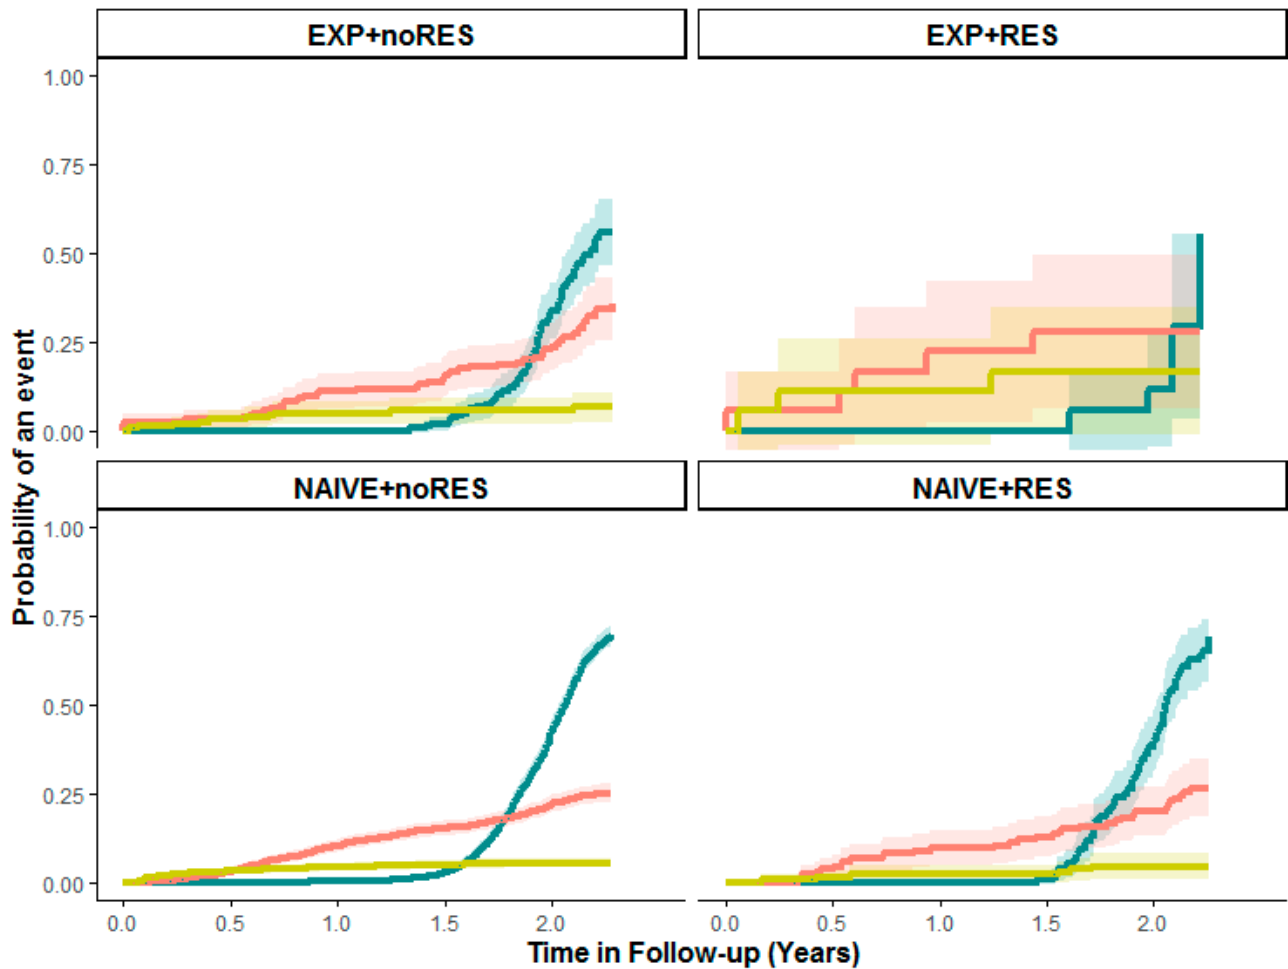

**Figure S1.** Estimated probability for remaining in care under viral suppression in competing risk with death and LTFU.

**Note:** Groups according to prior ART exposure and presence of NNRTI-PDR: EXP+noRES: experienced+non-resistant, EXP+RES: experienced+resistant, NAIVE+noRES: naive+non-resistant and NAIVE+RES: naive+resistant. Event: Viral suppression (dark green): participants with last viral load <200 copies/ml at the end of follow-up among persons with viral load information available within 6 months prior to the last database entry. LTFU, lost to follow-up (pink): defined as persons with a non-active status due to ART abandonment, migration to other healthcare systems, unknown status, as well as lack of viral load follow-up for more than 6 months at the dataset closure date. Death (light green).

Estimations from Fine Gray competing risk model are shown according to prior exposure to antiretroviral treatment+efavirenz/nevirapine resistance groups. The event of staying in care without viral suppression was censored. viral suppression: last viral load <200 copies/ml at the end of follow-up among persons with viral load information available within 6 months prior to the last database entry. LTFU, lost to follow-up: defined as persons with a non-active status due to ART abandonment, migration to other healthcare systems, unknown status, as well as lack of viral load follow-up for more than 6 months at the dataset closure date.
